# Supplementary material for: Exploring the Target and Molecular Mechanism of Astragalus Membranaceus in the Treatment of Vascular Cognitive Impairment Based on Systematic Pharmacology and Molecular Docking
Source: Research Square preprint supplement (doi:10.21203/rs.3.rs-1542486/v1), 2022-04-13
Supplement: Supplementary file 1 [file d02d547370f6a937f420640c.xlsx]

## Sheet: Sheet
Gene Map Search - 'Vascular cognitive impairment '
Downloaded:	Oct 01, 2021
Copyright (c) 1966-2021 Johns Hopkins University OMIM, data are provided for research purposes only.
Cytogenetic location	Genomic coordinates (From NCBI/GRCh38)	Gene/Locus	Gene/Locus name	Gene/Locus MIM number	Approved Symbol	Entrez Gene ID	Ensembl Gene ID	Comments	Phenotype	Phenotype MIM number	Inheritance	Pheno map key	Mouse Gene (from MGI)
1p36.22	1:11785722-11806102	MTHFR	Methylenetetrahydrofolate reductase	607093	MTHFR	4524	ENSG00000177000,ENST00000376583.7		Homocystinuria due to MTHFR deficiency	236250	Autosomal recessive	3	Mthfr
1p36.22	1:11785722-11806102	MTHFR	Methylenetetrahydrofolate reductase	607093	MTHFR	4524	ENSG00000177000,ENST00000376583.7		{Neural tube defects, susceptibility to}	601634	Autosomal recessive	3	Mthfr
1p36.22	1:11785722-11806102	MTHFR	Methylenetetrahydrofolate reductase	607093	MTHFR	4524	ENSG00000177000,ENST00000376583.7		{Schizophrenia, susceptibility to}	181500	Autosomal dominant	3	Mthfr
1p36.22	1:11785722-11806102	MTHFR	Methylenetetrahydrofolate reductase	607093	MTHFR	4524	ENSG00000177000,ENST00000376583.7		{Thromboembolism, susceptibility to}	188050	Autosomal dominant	3	Mthfr
1p36.22	1:11785722-11806102	MTHFR	Methylenetetrahydrofolate reductase	607093	MTHFR	4524	ENSG00000177000,ENST00000376583.7		{Vascular disease, susceptibility to}			3	Mthfr
1p36.13	1:19215659-19251523	EMC1, KIAA0090, CAVIPMR	Endoplasmic reticulum membrane protein complex, subunit 1	616846	EMC1	23065	ENSG00000127463,ENST00000375199.7		Cerebellar atrophy, visual impairment, and psychomotor retardation	616875	Autosomal recessive	3	Emc1
1p21.2	1:100719741-100739044	VCAM1	Vascular cell adhesion molecule-1	192225	VCAM1	7412	ENSG00000162692,ENST00000294728.7					Vcam1
2q32.2	2:188974372-189012745	COL3A1, EDSVASC, PMGEDSV	Collagen III, alpha-1 polypeptide	120180	COL3A1	1281	ENSG00000168542,ENST00000304636.9	in same 35kb segment as COL5A2	Ehlers-Danlos syndrome, vascular type	130050	Autosomal dominant	3	Col3a1
2q32.2	2:188974372-189012745	COL3A1, EDSVASC, PMGEDSV	Collagen III, alpha-1 polypeptide	120180	COL3A1	1281	ENSG00000168542,ENST00000304636.9	in same 35kb segment as COL5A2	Polymicrogyria with or without vascular-type EDS	618343	Autosomal recessive	3	Col3a1
2q36.3	2:227362037-227379305	TM4SF20, SLI5	Transmembrane 4 L6 family, member 20	615404	TM4SF20	79853	ENSG00000168955,ENST00000304568.4		{Specific language impairment 5}	615432	Autosomal dominant	3	Tm4sf20
3p26.1-p25.1	3:4000000-16300000	ARHI2	Age-related hearing impairment 2	612976		100302721		associated with rs11928865, rs779701, and rs779706	{Age-related hearing impairment 2}	612976		2
3p21.31	3:47802989-47850192	DHX30, DDX30, RETCOR, KIAA0890, NEDMIAL	DExH-box helicase 30	616423	DHX30	22907	ENSG00000132153,ENST00000348968.8		Neurodevelopmental disorder with severe motor impairment and absent language	617804	Autosomal dominant	3	Dhx30
3p13	3:70954707-71583977	FOXP1, QRF1	Forkhead box P1	605515	FOXP1	27086	ENSG00000114861,ENST00000318779.7		Mental retardation with language impairment and with or without autistic features	613670	Autosomal dominant	3	Foxp1
4q32.1	4:157220119-157370582	GRIA2, GLUR2, NEDLIB	Glutamate receptor, ionotropic, AMPA 2	138247	GRIA2	2891	ENSG00000120251,ENST00000296526.12		Neurodevelopmental disorder with language impairment and behavioral abnormalities	618917	Autosomal dominant	3	Gria2
4q34.3	4:176683537-176792921	VEGFC, VRP, LMPHM4	Vascular endothelial growth factor C	601528	VEGFC	7424	ENSG00000150630,ENST00000618562.2		Lymphatic malformation 4	615907	Autosomal dominant	3	Vegfc
5q31.3	5:141943580-141958811	PCDH12, VECAD2, DMJDS1	Protocadherin 12 (cadherin, vascular endothelial, 2)	605622	PCDH12	51294	ENSG00000113555,ENST00000231484.4		Diencephalic-mesencephalic junction dysplasia syndrome 1	251280	Autosomal recessive	3	Pcdh12
5q35.3	5:180601505-180650297	FLT4, VEGFR3, PCL, LMPHM1, CHTD7	fms-related tyrosine kinase-4 (vascular endothelial growth factor receptor 3)	136352	FLT4	2324	ENSG00000037280,ENST00000502649.5		Congenital heart defects, multiple types, 7	618780	Autosomal dominant	3	Flt4
5q35.3	5:180601505-180650297	FLT4, VEGFR3, PCL, LMPHM1, CHTD7	fms-related tyrosine kinase-4 (vascular endothelial growth factor receptor 3)	136352	FLT4	2324	ENSG00000037280,ENST00000502649.5		Hemangioma, capillary infantile, somatic	602089		3	Flt4
5q35.3	5:180601505-180650297	FLT4, VEGFR3, PCL, LMPHM1, CHTD7	fms-related tyrosine kinase-4 (vascular endothelial growth factor receptor 3)	136352	FLT4	2324	ENSG00000037280,ENST00000502649.5		Lymphatic malformation 1	153100	Autosomal dominant	3	Flt4
6p23	6:13400000-15200000	SCZD3	Schizophrenia susceptibility locus, chromosome 6-related	600511		6365		?same as DTNBP1; cognitive deficit type	{Schizophrenia}	181500	Autosomal dominant	2
6p21.33	6:31575564-31578335	TNF, TNFA	Tumor necrosis factor (cachectin)	191160	TNF	7124	ENSG00000232810,ENST00000449264.3	5'-LTA--TNF-3' in 7kb segment (pter-cen); 210kb from HLA-B	{Asthma, susceptibility to}	600807	Autosomal dominant	3	Tnf
6p21.33	6:31575564-31578335	TNF, TNFA	Tumor necrosis factor (cachectin)	191160	TNF	7124	ENSG00000232810,ENST00000449264.3	5'-LTA--TNF-3' in 7kb segment (pter-cen); 210kb from HLA-B	{Dementia, vascular, susceptibility to}			3	Tnf
6p21.33	6:31575564-31578335	TNF, TNFA	Tumor necrosis factor (cachectin)	191160	TNF	7124	ENSG00000232810,ENST00000449264.3	5'-LTA--TNF-3' in 7kb segment (pter-cen); 210kb from HLA-B	{Malaria, cerebral, susceptibility to}	611162		3	Tnf
6p21.33	6:31575564-31578335	TNF, TNFA	Tumor necrosis factor (cachectin)	191160	TNF	7124	ENSG00000232810,ENST00000449264.3	5'-LTA--TNF-3' in 7kb segment (pter-cen); 210kb from HLA-B	{Migraine without aura, susceptibility to}	157300	Autosomal dominant	3	Tnf
6p21.33	6:31575564-31578335	TNF, TNFA	Tumor necrosis factor (cachectin)	191160	TNF	7124	ENSG00000232810,ENST00000449264.3	5'-LTA--TNF-3' in 7kb segment (pter-cen); 210kb from HLA-B	{Septic shock, susceptibility to}			3	Tnf
6p21.1	6:43770208-43786486	VEGF, MVCD1	Vascular endothelial growth factor	192240	VEGFA	7422	ENSG00000112715,ENST00000372055.9		{Microvascular complications of diabetes 1}	603933		3	Vegfa
7p15.2	7:27100353-27102682	HOXA2, MCOHI	Homeobox A2	604685	HOXA2	3199	ENSG00000105996,ENST00000222718.7	mutation identified in 1 MCOHICP family	?Microtia, hearing impairment, and cleft palate (AR)	612290	Autosomal dominant; Autosomal recessive	3	Hoxa2
7p15.2	7:27100353-27102682	HOXA2, MCOHI	Homeobox A2	604685	HOXA2	3199	ENSG00000105996,ENST00000222718.7	mutation identified in 1 MCOHICP family	Microtia with or without hearing impairment (AD)	612290	Autosomal dominant; Autosomal recessive	3	Hoxa2
7q35-q36	7:143400000-159345973	SLI4	Specific language impairment 4	612514		100233227		associated with rs1723629	{Specific language impairment 4}	612514		2
8q24.13-q24.22	8:121500000-135400000	ARHI1	Age-related hearing impairment 1	612448		100233147		between rs3765212 and rs4601326	{Age-related hearing impairment 1}	612448		2
9q31.1-q31.2	9:105244607-105439774	SLC44A1, CTL1, CDW92, CONATOC	Solute carrier family 44, member 1	606105	SLC44A1	23446	ENSG00000070214,ENST00000374723.5		Neurodegeneration, childhood-onset, with ataxia, tremor, optic atrophy, and cognitive decline	618868	Autosomal recessive	3	Slc44a1
9q32	9:114784634-114806038	TNFSF15, TL1, VEGI	Tumor necrosis factor ligand superfamily, member 15 (vascular endothelial growth inhibitor)	604052	TNFSF15	9966	ENSG00000181634,ENST00000374045.5					Tnfsf15
11q13.1	11:64234583-64239263	VEGFB, VRF	Vascular endothelial growth factor B	601398	VEGFB	7423	ENSG00000173511,ENST00000426086.3					Vegfb
11q22.1	11:102109956-102233423	YAP1, COB1	YES1-associated transcriptional regulator	606608	YAP1	10413	ENSG00000137693,ENST00000282441.10		Coloboma, ocular, with or without hearing impairment, cleft lip/palate, and/or mental retardation	120433	Autosomal dominant	3	Yap1
12q13.13	12:51591232-51812863	SCN8A, CIAT, DEE13, BFIS5, MYOCL2	Sodium voltage-gated channel, alpha subunit 8	600702	SCN8A	6334	ENSG00000196876,ENST00000545061.5	mutation identified in 1 MYOCL2 family	?Myoclonus, familial, 2	618364	Autosomal dominant	3	Scn8a
12q13.13	12:51591232-51812863	SCN8A, CIAT, DEE13, BFIS5, MYOCL2	Sodium voltage-gated channel, alpha subunit 8	600702	SCN8A	6334	ENSG00000196876,ENST00000545061.5	mutation identified in 1 MYOCL2 family	Cognitive impairment with or without cerebellar ataxia	614306	Autosomal dominant	3	Scn8a
12q13.13	12:51591232-51812863	SCN8A, CIAT, DEE13, BFIS5, MYOCL2	Sodium voltage-gated channel, alpha subunit 8	600702	SCN8A	6334	ENSG00000196876,ENST00000545061.5	mutation identified in 1 MYOCL2 family	Developmental and epileptic encephalopathy 13	614558	Autosomal dominant	3	Scn8a
12q13.13	12:51591232-51812863	SCN8A, CIAT, DEE13, BFIS5, MYOCL2	Sodium voltage-gated channel, alpha subunit 8	600702	SCN8A	6334	ENSG00000196876,ENST00000545061.5	mutation identified in 1 MYOCL2 family	Seizures, benign familial infantile, 5	617080	Autosomal dominant	3	Scn8a
13q12.3	13:28300345-28495127	FLT1	fms-related tyrosine kinase-1 (vascular endothelial growth factor/vascular permeability factor receptor)	165070	FLT1	2321	ENSG00000102755,ENST00000615840.4	150kb from FLT3				Flt1
13q21	13:68100000-72800000	SLI3	Specific language impairment QTL, 3	607134		780906		max with D13S1317	Specific language impairment QTL, 3	607134		2
14q24.3	14:74941829-74955763	PGF, PLGF	Placental growth factor, vascular endothelial growth factor-related protein	601121	PGF	5228	ENSG00000119630,ENST00000553716.5					Pgf
14q32.32-q32.33	14:103385393-103503830	MARK3, VIPB	MAP/microtubule affinity-regulating kinase-3	602678	MARK3	4140	ENSG00000075413,ENST00000429436.7	mutation identified in 1 VIPB family	?Visual impairment and progressive phthisis bulbi	618283	Autosomal recessive	3	Mark3
15q21.2	15:52115099-52191391	GNB5, GB5, IDDCA, LADCI	Guanine nucleotide-binding protein, beta-5	604447	GNB5	10681	ENSG00000069966,ENST00000358784.11		Intellectual developmental disorder with cardiac arrhythmia	617173	Autosomal recessive	3	Gnb5
15q21.2	15:52115099-52191391	GNB5, GB5, IDDCA, LADCI	Guanine nucleotide-binding protein, beta-5	604447	GNB5	10681	ENSG00000069966,ENST00000358784.11		Language delay and ADHD/cognitive impairment with or without cardiac arrhythmia	617182	Autosomal recessive	3	Gnb5
16p11.2	16:30956617-30984663	SETD1A, SET1A, SET1, KIAA0339, EPEDD, NEDSID	SET domain-containing protein 1A	611052	SETD1A	9739	ENSG00000099381,ENST00000262519.14		Epilepsy, early-onset, with or without developmental delay	618832	Autosomal dominant	3	Setd1a
16p11.2	16:30956617-30984663	SETD1A, SET1A, SET1, KIAA0339, EPEDD, NEDSID	SET domain-containing protein 1A	611052	SETD1A	9739	ENSG00000099381,ENST00000262519.14		Neurodevelopmental disorder with speech impairment and dysmorphic facies	619056	Autosomal dominant	3	Setd1a
16q	16:36800000-90338345	SLI1	Specific language impairment QTL, 1	606711		171013			Specific language impairment QTL, 1	606711	Multifactorial	2
17q22	17:57971546-57988253	VEZF1, ZNF161	Vascular endothelial zinc finger 1	606747	VEZF1	7716	ENSG00000136451,ENST00000581208.2					Vezf1
19p13.13	19:12672469-12681879	DHPS, NEDSSWI	Deoxyhypusine synthase	600944	DHPS	1725	ENSG00000095059,ENST00000594424.5		Neurodevelopmental disorder with seizures and speech and walking impairment	618480	Autosomal recessive	3	Dhps
19q	19:26200000-58617616	SLI2	Specific language impairment QTL, 2	606712		171014			Specific language impairment QTL, 2	606712	Multifactorial	2
20q13.12	20:46366049-46407050	ELMO2, CED12, VMPI	Engulfment and cell motility gene 2	606421	ELMO2	63916	ENSG00000062598,ENST00000372176.5		Vascular malformation, primary intraosseous	606893	Autosomal recessive	3	Elmo2
22q13.2	22:42160012-42283926	TCF20, SPBP, AR1, DDVIBA	Transcription factor 20	603107	TCF20	6942	ENSG00000100207,ENST00000677622.1		Developmental delay with variable intellectual impairment and behavioral abnormalities	618430	Autosomal dominant	3	Tcf20
Xp22.2	X:15345595-15384412	FIGF, VEGFD	c-fos induced growth factor (vascular endothelial growth factor D)	300091	VEGFD	2277	ENSG00000165197,ENST00000297904.4					Vegfd
Xq	X:61000000-156040895	CGF1	Cognitive function-1, social	300082		1083		imprinted locus	[Social cognition]	300082	X-linked	2
Xq23	X:110194185-110440232	AMMECR1, MFHIEN	Alport syndrome, mental retardation, midface hypoplasia, and elliptocytosis chromosomal region gene 1	300195	AMMECR1	9949	ENSG00000101935,ENST00000372059.6		Midface hypoplasia, hearing impairment, elliptocytosis, and nephrocalcinosis	300990	X-linked recessive	3	Ammecr1
Phenotype Mapping Key
1 - The disorder is placed on the map due to its association with a gene, but the underlying defect is not known.
2 - The disorder was placed on the map by statistical methods.
3 - The molecular basis of the disorder is known.
4 - A contiguous gene duplication or deletion syndrome in which multiple genes are involved.

## Sheet: Venn
ZNF161
YAP1
VRP
VRF
VMPI
VIPB
VEZF1
VEGI
VEGFR3
VEGFD
VEGFC
VEGFB
VEGF
VECAD2
VCAM1
TNFSF15
TNFA
TNF
TM4SF20
TL1
TCF20
SPBP
SLI5
SLI4
SLI3
SLI2
SLI1
SLC44A1
SETD1A
SET1A
SET1
SCZD3
SCN8A
RETCOR
QRF1
PMGEDSV
PLGF
PGF
PCL
PCDH12
NEDSSWI
NEDMIAL
NEDLIB
MYOCL2
MVCD1					NEDSID
MTHFR					NEDSID
MFHIEN
MCOHI
MARK3
LMPHM4
LMPHM1
LADCI
KIAA0890
KIAA0339
KIAA0090
IDDCA
HOXA2
GRIA2
GNB5
GLUR2
GB5
FOXP1
FLT4
FLT1
FIGF
EPEDD
EMC1
ELMO2
EDSVASC
DMJDS1
DHX30
DHPS
DEE13
DDX30
DDVIBA
CTL1
CONATOC
COL3A1
COB1
CIAT
CHTD7
CGF1
CED12
CDW92
CAVIPMR
BFIS5
ARHI2
ARHI1
AR1
AMMECR1
